# Supplementary material for: Morphological Transformation of Peptide Nanoassemblies through Conformational Transition of Core-forming Peptides
Source: Polymers (Basel). 2018 Dec 28;11(1):39. doi: 10.3390/polym11010039 (PMC6401806; doi:10.3390/polym11010039)
Supplement: Supplementary file 1 [file polymers-11-00039-s001.docx]

*Supporting Information*

Morphological Transformation of Peptide Nanoassemblies through Conformational Transition of Core-forming Peptides

*Tomonori Waku 1,*, Naoyuki Hirata 1, Masamichi Nozaki 1, Kanta Nogami 1, Shigeru Kunugi 1, and Naoki Tanaka 1*

1Faculty of Molecular Chemistry and Engineering, Kyoto Institute of Technology, Gosyokaido-cho, Matsugasaki, Sakyo-ku, Kyoto 606-8585, Japan

*To whom correspondence should be addressed.

Faculty of Molecular Chemistry and Engineering, Kyoto Institute of Technology, Gosyokaido-cho, Matsugasaki, Sakyo-ku, Kyoto 606-8585, Japan. Tel.: +81 75 724 7811; Fax: +81 75 724 7861; E-mail: [waku1214@kit.ac.jp](mailto:waku1214@kit.ac.jp)

**Contents**

**Figure S1** (a) Helical content of K20-EG12 (circle), K16F4-EG12 (triangle), and F4K16-EG12 (square) in 25% TFE aqueous solution at various pHs. (b) Helical content of K20-EG12 in water at various pH values.

**Figure S2** pH dependence of **217 for F4K16-EG12 (square) and K16F4-EG12 (triangle) in water.

**Figure S3** (a, b) TEM images of the nanostructures of F4K16-EG12 obtained in 25% TFE aqueous solution at pH 9.6 (a) and at pH 8.9 (b). (c) TEM image of the nanostructures of K20-EG12 obtained in 25% TFE aqueous solution at pH 9.3. (d) TEM image of the nanostructures of K16F4-EG12 obtained in 25% TFE aqueous solution at pH 9.7. Scale bars represent 200 nm.

**Figure S4** DLS histograms for the nanostructures of F4K16-EG12 in 25% TFE aqueous solution.: (a) vesicles, (b) large compound micelles.

**Figure S5** AFM images of nanostructures of F4K16-EG12 obtained in 25% TFE aqueous solution under basic condition. Cross-sectional images of the nanostructures.

**Figure S6** TEM images of the nanostructures of F4K16-EG12 obtained in 25% TFE aqueous solution at pH 9.2 (a, b) and at pH 9.5 (c, d). Scale bars represent 200 nm.

**Figure S7** TEM images of the nanostructures of F4K16-EG12 obtained by the dialysis of its vesicle dispersion against buffer solution at pH 12.0 (a) and at pH 10.9. Scale bars represent 200 nm.

**Figure S8** Size distribution of arc-shaped nanostructures consisting of F4K16-EG12. The number of nanostructures measured is 105.

**Figure S9** AFM image of arc-shaped nanostructures consisting of F4K16-EG12. Cross-sectional images of the nanostructures.

**Figure S10** TEM images of the nanostructures of F4K16-EG12 obtained by the dialysis of its vesicle dispersion against buffer solution at pH 11.9. Scale bar represents 200 nm.

**Figure S11** TEM images of the aggregates of F4K16-EG12 obtained by the dialysis of its vesicle dispersion against buffer solution at pH 10.1 (a) and at pH 12.7 (b).

**Figure S12** TEM images of the aggregates of F4K16-EG12 obtained by pH adjustment to pH 10.9 (a) and pH 12.1 (b) from pH 4 in water.


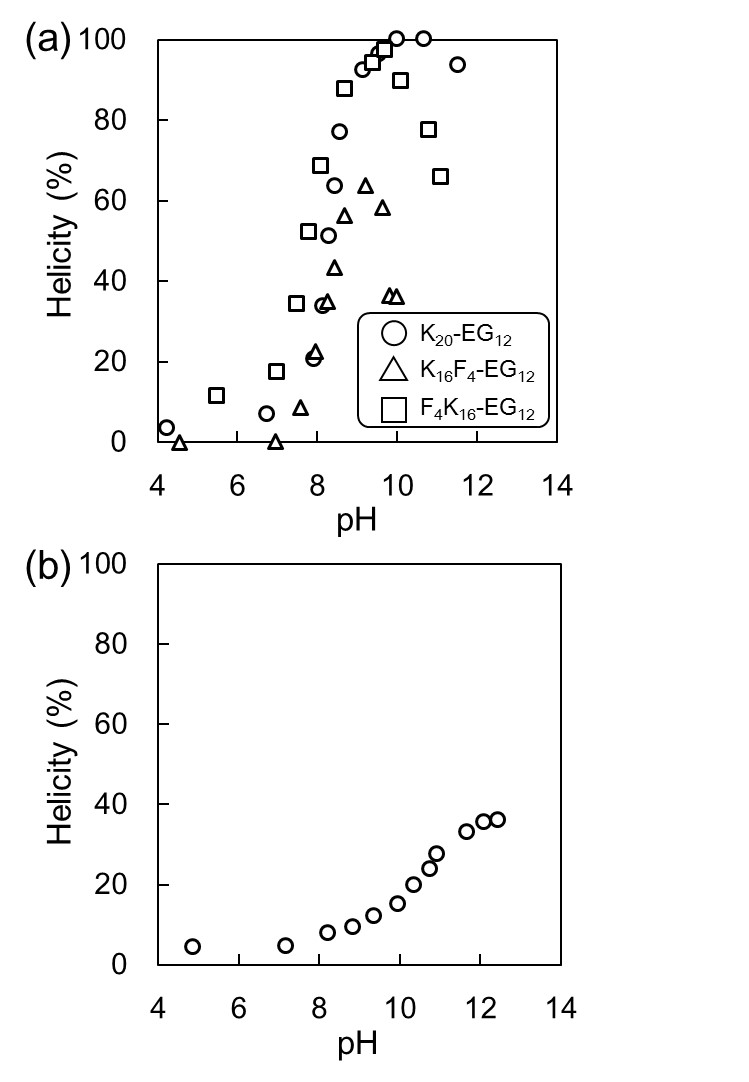


**Figure S1** (a) Helical content of K20-EG12 (circle), K16F4-EG12 (triangle), and F4K16-EG12 (square) in 25% TFE aqueous solution at various pHs. (b) Helical content of K20-EG12 in water at various pH values.


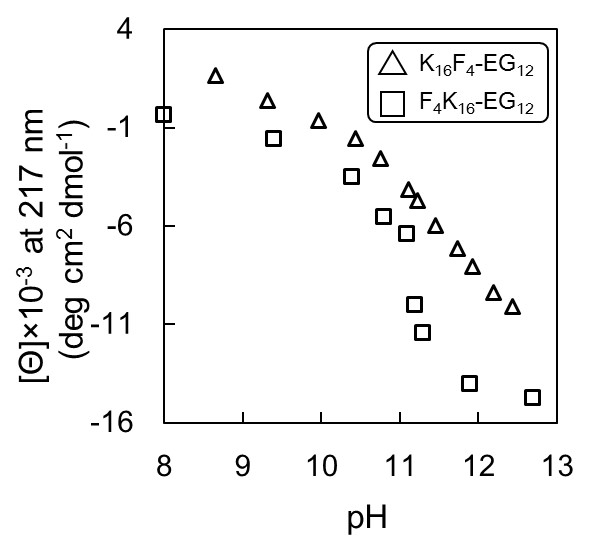


**Figure S2** pH dependence of **217 for F4K16-EG12 (square) and K16F4-EG12 (triangle) in water.


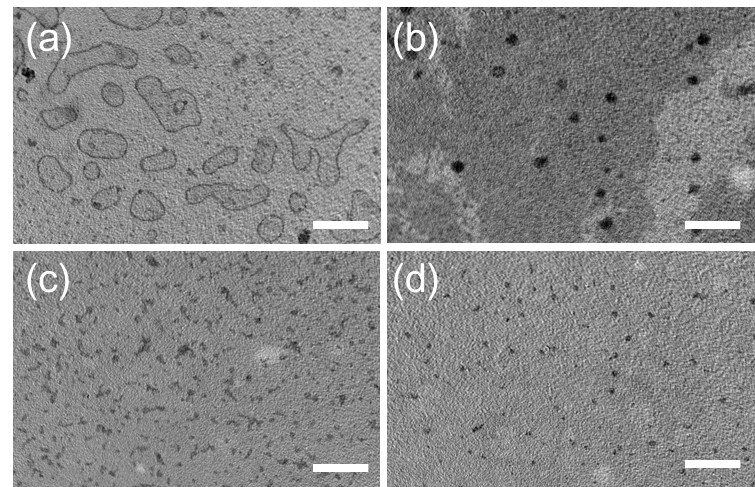


**Figure S3** (a, b) TEM images of the nanostructures of F4K16-EG12 obtained in 25% TFE aqueous solution at pH 9.6 (a) and at pH 8.9 (b). (c) TEM image of the nanostructures of K20-EG12 obtained in 25% TFE aqueous solution at pH 9.3. (d) TEM image of the nanostructures of K16F4-EG12 obtained in 25% TFE aqueous solution at pH 9.7. Scale bars represent 200 nm.


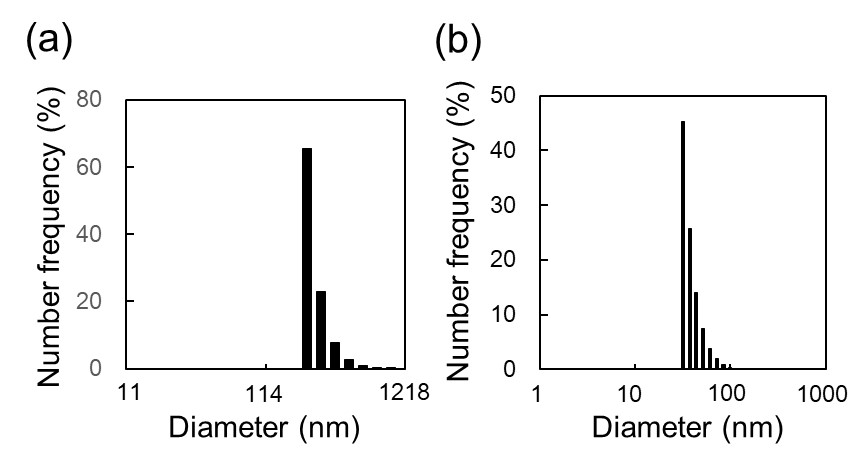


**Figure S4** DLS histograms for the nanostructures of F4K16-EG12 in 25% TFE aqueous solution.: (a) vesicles, (b) large compound micelles.


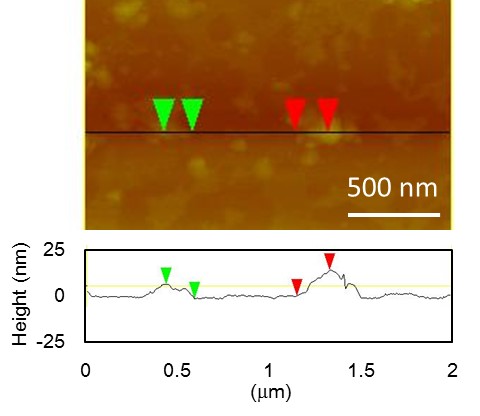


**Figure S5** AFM images of nanostructures of F4K16-EG12 obtained in 25% TFE aqueous solution under basic condition. Cross-sectional images of the nanostructures.


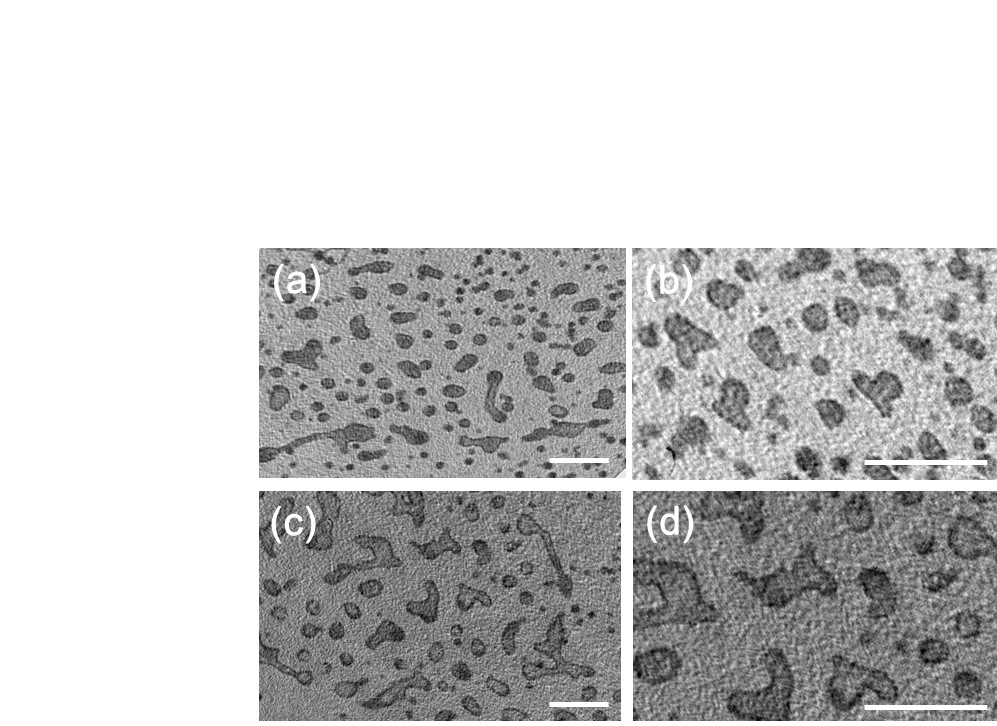


**Figure S6** TEM images of the nanostructures of F4K16-EG12 obtained in 25% TFE aqueous solution at pH 9.2 (a, b) and at pH 9.5 (c, d). Scale bars represent 200 nm.


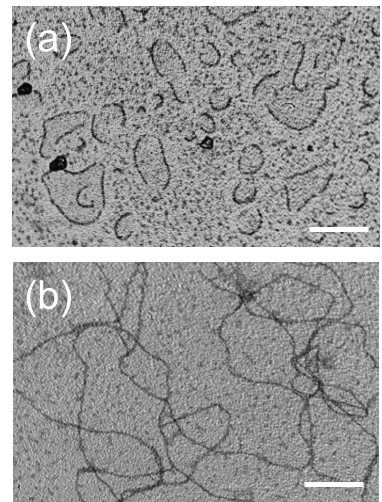


**Figure S7** TEM images of the nanostructures of F4K16-EG12 obtained by the dialysis of its vesicle dispersion against buffer solution at pH 12.0 (a) and at pH 10.9. Scale bars represent 200 nm.


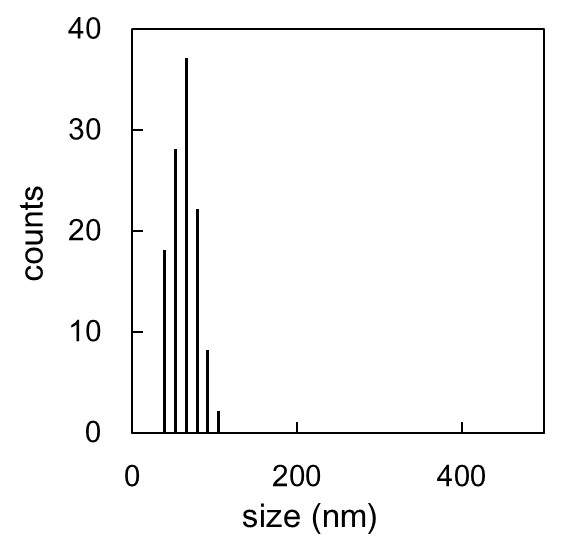


**Figure S8** Size distribution of arc-shaped nanostructures consisting of F4K16-EG12. The number of nanostructures measured is 105.

**Figure S9** AFM image of arc-shaped nanostructures consisting of F4K16-EG12. Cross-sectional images of the nanostructures.


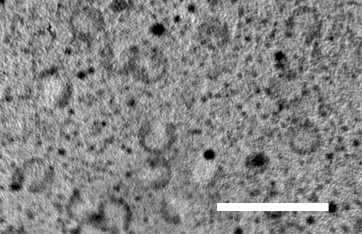


**Figure S10** TEM images of the nanostructures of F4K16-EG12 obtained by the dialysis of its vesicle dispersion against buffer solution at pH 11.9. Scale bar represents 200 nm.


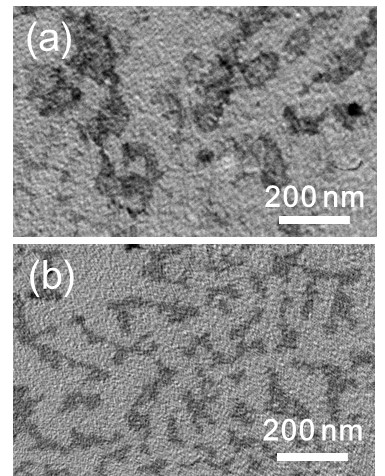


**Figure S11** TEM images of the aggregates of F4K16-EG12 obtained by the dialysis of its vesicle dispersion against buffer solution at pH 10.1 (a) and at pH 12.7 (b).


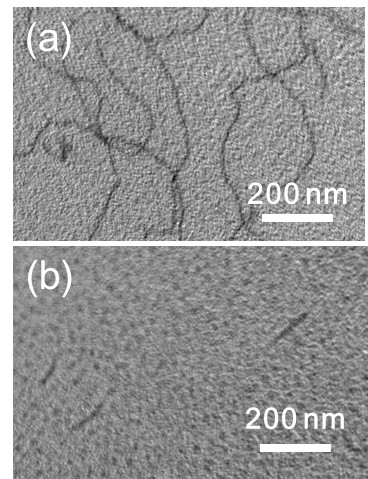


**Figure S12** TEM images of the aggregates of F4K16-EG12 obtained by pH adjustment to pH 10.9 a) and pH 12.1 (b) from pH 4 in water.
